# Supplementary material for: Mercury anomalies across the Palaeocene–Eocene Thermal Maximum
Source: Copernicus journal article supplement (doi:10.5194/cp-15-217-2019), 2019-02-06
Supplement: Supplementary file 1 [file cp-15-217-2019-supplement.zip]

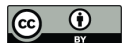

## *Supplement of*

# **Mercury anomalies across the Palaeocene–Eocene Thermal Maximum**

**Morgan T. Jones et al.**

*Correspondence to:* Morgan T. Jones ([m.t.jones@geo.uio.no](mailto:m.t.jones@geo.uio.no))

- [cp-15-217-2019-supplement-title-page.pdf](#)
- [Jones et al Supplementary Material.pdf](#)
- [Supplementary data table.xlsx](#)

The copyright of individual parts of the supplement might differ from the CC BY 4.0 License.
